# Supplementary material for: Lake water volume fluctuations in response to climate change in Xinjiang, China from 2002 to 2018
Source: PeerJ. 2020 Aug 20;8:e9683. doi: 10.7717/peerj.9683 (PMC7443322; doi:10.7717/peerj.9683)
Supplement: Supplemental Information 1 — The raw data was used to further verify the accuracy of SVM classification results. [file peerj-08-9683-s001.xlsx]

## Sheet: sheet1
Dataset name:Hydroweb data
Accession number:adilagupur@126.com password:adilalyar641.
URL:http://hydroweb.theia-land.fr/
aksayqin	Hydroweb	classification result		ayakkum	Hydroweb	classification result		bosten	Hydroweb	classification result
2002-10-28	177.87	173.659		2003-10-25	728	758.174		2002-11-03	1345.43	1340.48
2003-04-22	186.88	180.743		2004-02-26	724	734.562		2003-04-27	1347.91	1351.12
2003-10-25	178.23	178.811		2004-10-13	720	759.29		2003-06-03	1316.35	1359.56
2004-04-05	186.16	180.434		2005-02-27	728	745.51		2003-10-20	1245.14	1262.99
2004-06-14	180.03	185.465		2005-10-30	772	774.918		2004-03-10	1274.99	1233.06
2005-02-27	181.3	180.69		2006-03-03	756	805.829		2004-06-21	1209.63	1159.34
2005-05-29	180.93	186.109		2006-06-02	764	813.771		2004-10-05	1122.94	1112.28
2005-10-30	188.33	191.905		2006-11-03	796	828.797		2005-02-21	1097.48	1074.46
2006-03-02	187.61	179.455		2007-10-11	752	815.703		2005-06-06	1105.84	1078.41
2006-11-02	210.51	203.926		2008-02-26	784	827.509		2005-10-23	1061.88	1042.81
2007-03-20	209.06	202.334		2008-10-13	804	815.703		2006-03-15	1127.62	1142.69
2007-06-05	211.23	211.308		2009-10-09	836	878.169		2006-06-25	1067.2	978.844
2007-10-22	211.05	205.214		2010-10-10	904	916.807		2006-10-09	1057.67	974.98
2008-06-23	215.38	218.308		2011-03-01	888	904.572		2007-04-02	1041.39	1045.91
2008-10-06	219.16	215.214		2011-06-27	900	903.284		2007-06-10	988.73	963.817
2009-03-17	218.8	214.873		2011-10-18	912	932.263		2007-10-30	986.74	936.77
2009-06-09	215.56	219.685		2012-03-03	896	894.483		2008-03-17	1037.23	1075.69
2009-10-26	212.14	211.009		2012-06-25	916	897.273		2008-07-02	964.33	963.817
2010-04-20	211.95	210.119		2012-10-16	952	970.687		2008-09-09	938.33	936.77
2010-06-29	208.89	210.58		2013-03-11	940	932.263		2009-04-20	973.57	970.046
2010-11-01	206.71	210.365		2013-06-12	940	959.954		2009-06-28	921.22	934.624
2011-03-27	211.65	214.118		2013-09-22	956	992.367		2011-03-05	934.27	971.974
2011-06-20	211	209.078		2014-03-15	960	947.718		2011-06-12	942.67	908.865
2011-11-04	209.22	209.167		2014-07-02	956	975.194
2012-03-30	212.84	210.826		2014-10-12	956	985.713
2012-06-22	208.27	201.135		2015-04-03	952	968.54
2012-11-07	210.11	212.941		2015-09-26	972	1005.68
2013-03-04	222.8	222.861		2016-03-21	972	962.529
2013-06-20	218.65	228.397		2016-06-17	976	982.707
				2016-10-24	1008	1013.19
				2017-03-13	1002.79	987.43
				2017-06-19	1008	985.927
				2017-10-04	1044	1015.12
				2018-03-26	1032.63	999.665
				2018-06-15	1036.94	1009.33
				2018-10-23	1076	1053.76
